# Supplementary material
Source: Royal Society of Chemistry journal article supplement (doi:10.1039/d6ta03441a)
Supplement: d6ta03441a1.pdf [file d6ta03441a1.pdf]

## Supporting Information

### **Closed-Loop Engineering of Chemically Anchored Lead-Carbon Composites via Thermodynamic-Kinetic Synergy for Ultra-Long-Life Lead-carbon Batteries**

Jiecai Li <sup>a</sup>, Yang Sun <sup>a</sup>, Qilong Wang <sup>a</sup>, Zhiqiang Liu <sup>a</sup>, Yupeng Wu <sup>a</sup>, Qinwen You <sup>a</sup>, Xin Ding <sup>a</sup>, Tangjun Wang <sup>a</sup>, Chuanbo Wei <sup>a</sup>, Guobing Wang <sup>c</sup>, Nan Lin <sup>a, b\*</sup> Haibo Lin <sup>a\*\*</sup>

<sup>a</sup> State Key Laboratory of Inorganic Synthesis and Preparative Chemistry, Jilin University, Changchun 130012, Jilin, China

<sup>b</sup> National Demonstration Center for Experimental Chemistry Education, Jilin University, Changchun 130012, China

<sup>c</sup> Guangdong Yingyeda Electronics Co., Ltd, Guangzhou 510000, Guangdong, China

\* Corresponding author.

\*\* Corresponding author.

Email: nanlin@jlu.edu.cn (N. Lin), lhb910@jlu.edu.cn (H.B. Lin).

---

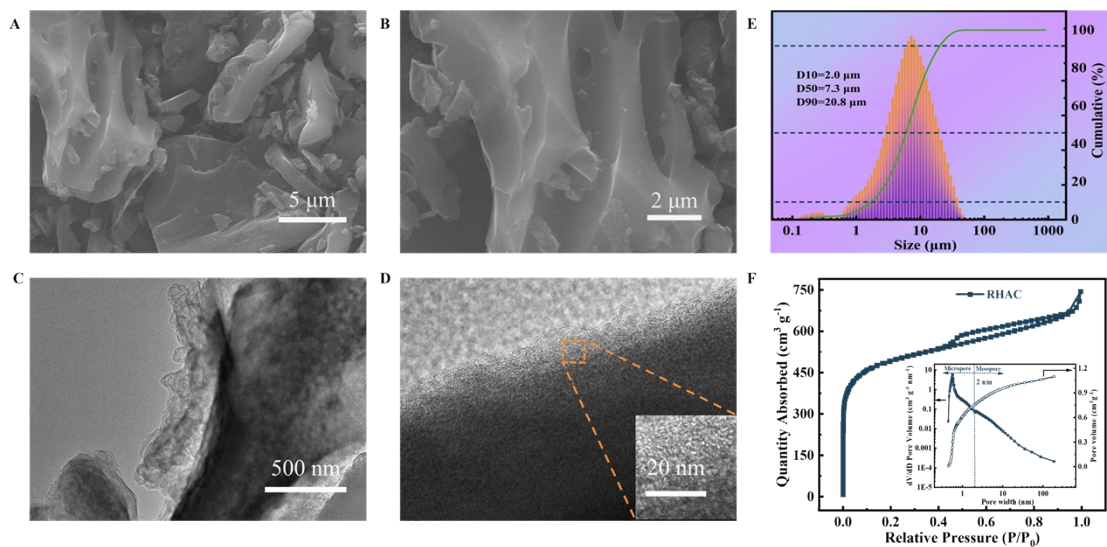

**Fig. S1.** RHAC of (A-B) SEM images, (C) TEM image, (D) HRTEM image, (E) particle size distribution curve; (F) N<sub>2</sub> adsorption-desorption isotherms curve, the inset shows the PSD curve obtained by the DFT method.

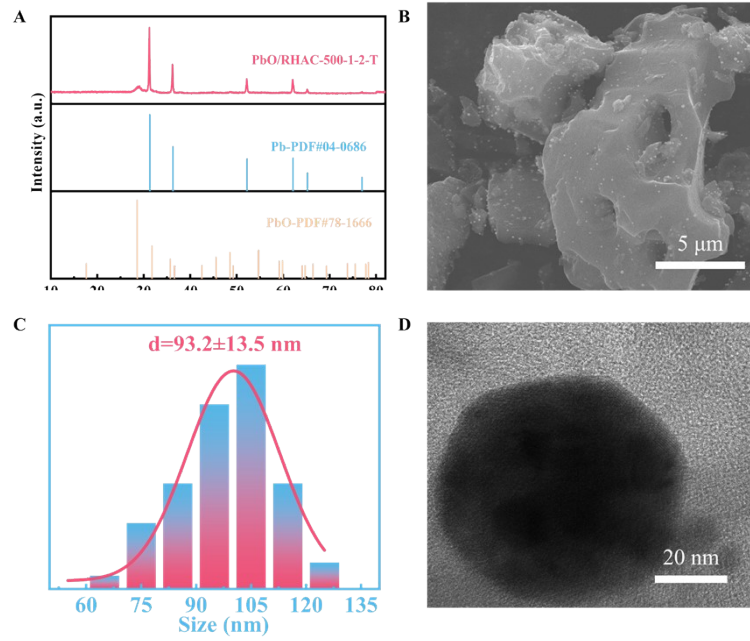

**Fig. S2.** (A) XRD pattern, (B) SEM image, (C) corresponding particle size distribution, and (D) TEM image of PbO/RHAC-500-1-2-T.

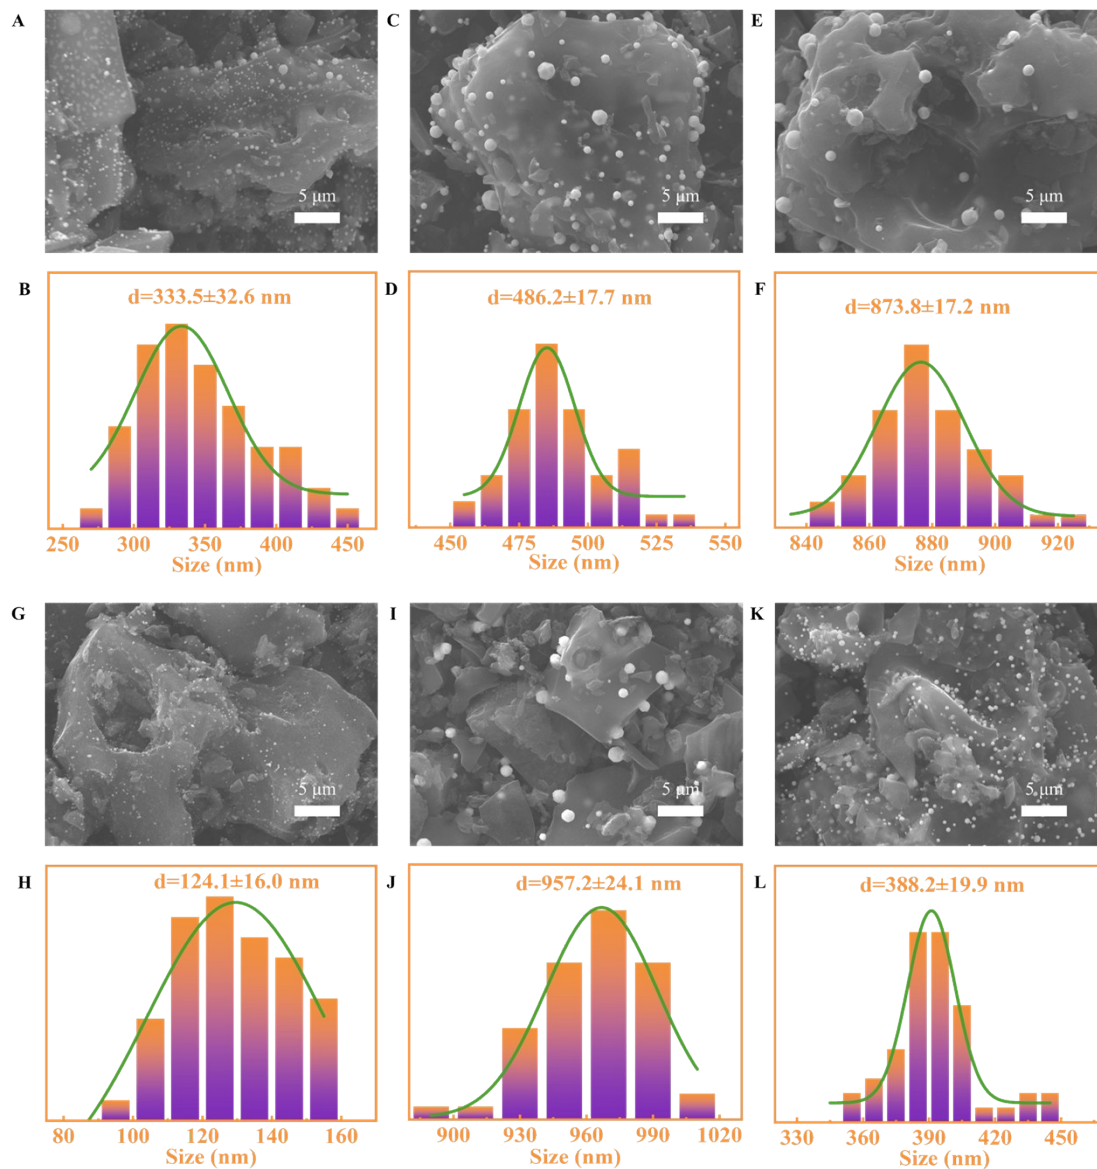

**Fig. S3.** SEM image and PbO particle size distribution histogram of (A, B) PbO/RHAC-500-1-2, (C, D) PbO/RHAC-500-2-2, (E, F) PbO/RHAC-500-3-2, (G, H) PbO/RHAC-400-2-2, (I, J) PbO/RHAC-550-2-2, and (K, L) PbO/RHAC-450-2-15. As the holding time increases, PbO particles undergo further sintering and coarsening. At 400 °C, the precursor decomposes incompletely, resulting in uniformly dispersed particles; at 550 °C, severe Ostwald ripening and agglomeration occur. Increasing the heating rate also leads to coarsening of the PbO samples.

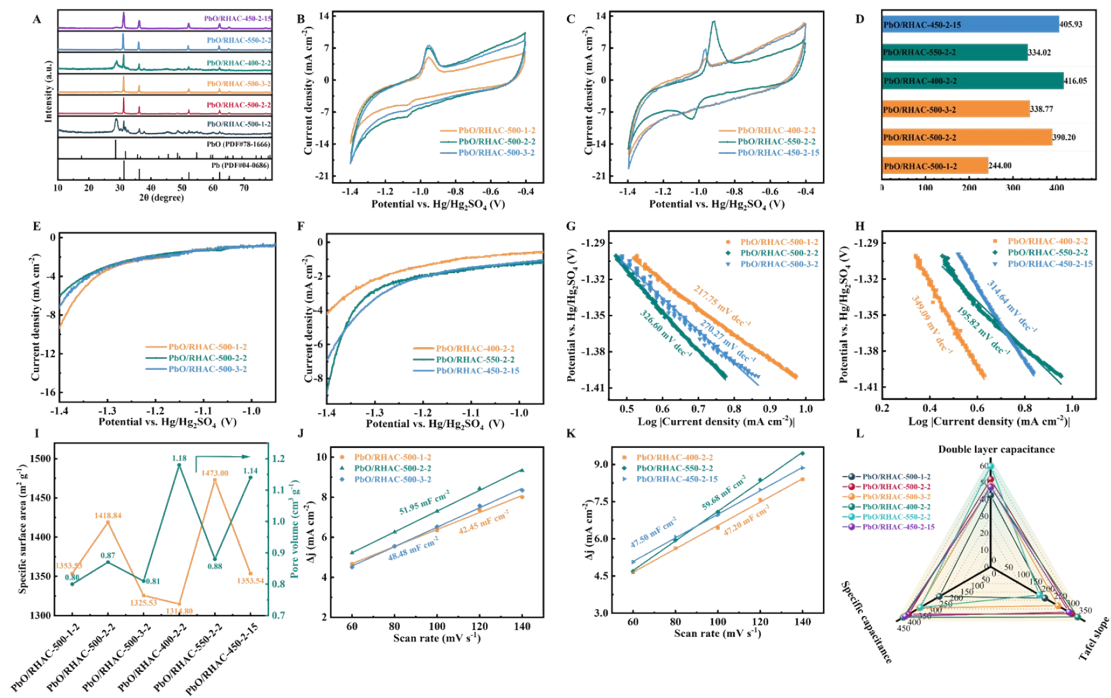

**Fig. S4.** (A) XRD pattern. (B-C) CV curves and (D) specific capacitance. (E-F) LSV curves and (G-H) Tafel plots. (I) Specific surface area and pore volume. (J-K) Double-layer capacitance. (L) Composite performance radar chart.

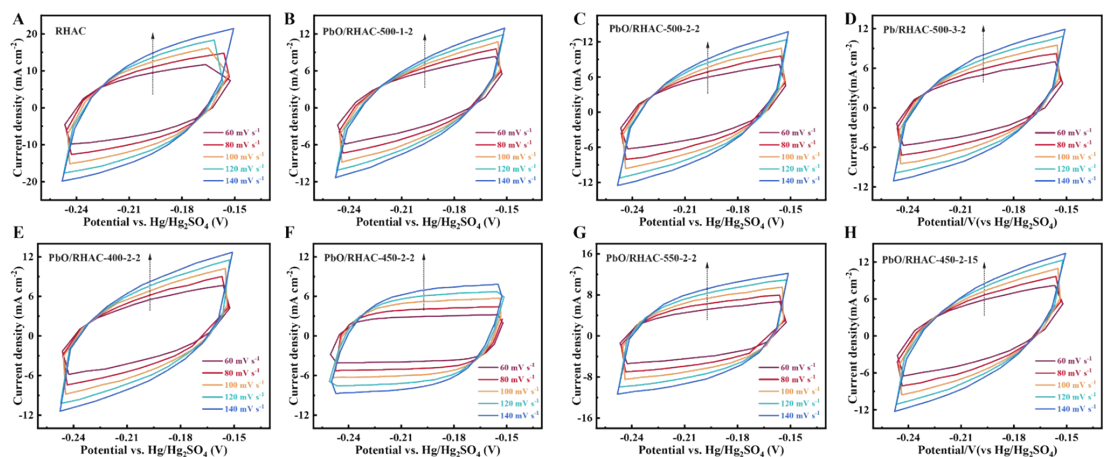

**Fig. S5.** CV curves of (A) RHAC, (B) PbO/RHAC-500-1-2, (C) PbO/RHAC-500-2-2, (D) PbO/RHAC-500-3-2, (E) PbO/RHAC-400-2-2, (F) PbO/RHAC-450-2-2, (G) PbO/RHAC-550-2-2, and (H) PbO/RHAC-450-2-15 at different scan rates.

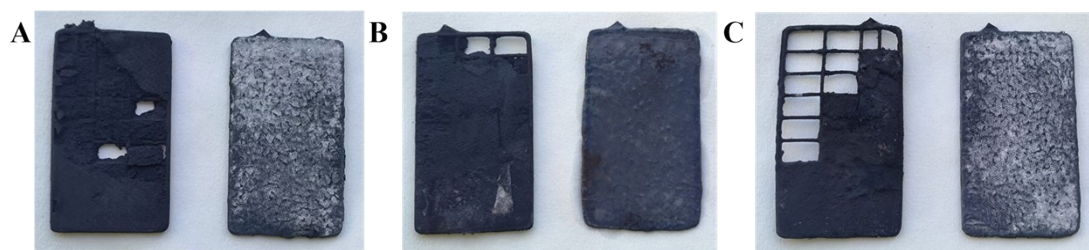

**Fig. S6.** Photographs of the positive electrode (left) and negative electrode (right) after cycling: (A) Blank battery, (B) RHAC battery, (C) PbO/RHAC battery.

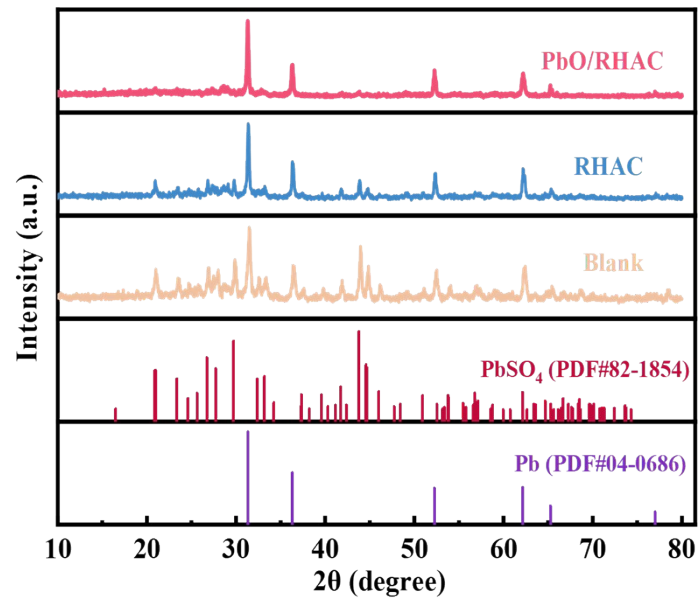

**Fig. S7.** XRD pattern of NAM after cycling.

**Table S1.** Process parameters for large-scale preparation of PbO/RHAC.

| Number | Operating unit                             | Control parameter name        | Control range               |
|--------|--------------------------------------------|-------------------------------|-----------------------------|
| 1      | Complexation precipitation reaction        | Temperature range             | < 40 °C                     |
|        |                                            | Impregnation pH               | 5 – 7                       |
|        |                                            | Complexation precipitation pH | 2 – 5                       |
| 2      | Solid liquid separation and washing        | Temperature range             | 20 – 40 °C                  |
|        |                                            | pH                            | 5 – 7                       |
|        |                                            | Pressure range                | 1 – 12 MPa                  |
| 3      | Drying                                     | Temperature range             | 80 – 100 °C                 |
|        |                                            | Temperature range             | 450 – 500 °C                |
| 4      | Heat treatment                             | Heating rate                  | 2 – 15 °C min <sup>-1</sup> |
|        |                                            | holding time                  | ≥ 2 h                       |
|        |                                            | Temperature range             | < 40 °C                     |
| 5      | Mother liquor recovery and waste treatment | Temperature range             | < 40 °C                     |
|        |                                            | Recycling pH                  | 4 – 5                       |

**Table S2.** Structural parameters of XAYG1/250-UK

| Structure           | Parameter        | Structure            | Parameter          | Structure                 | Parameter               |
|---------------------|------------------|----------------------|--------------------|---------------------------|-------------------------|
| Filter area         | 1 m <sup>2</sup> | Number of plates     | 11 pieces          | Foundation size           | 1100 mm                 |
| Flushing method     | Side wash        | Cylinder             | 100                | Main beam form            | Round steel             |
| Pressing pressure   | 12 MPa           | Back pressure        | 30 MPa             | Size of filter plate      | 250×250 mm              |
| Effluent form       | Undercurrent     | Pulling plate mode   | Manual hydraulic   | Feed hole position        | Angular advance         |
| Anti corrosion form | Plastic          | Material temperature | normal temperature | Filter cloth              | 0303 permeability       |
| Filter plate form   | Plastic          | Handle bottom height | 110 mm             | Filter plate form         | High pressure diaphragm |
| Feed pressure       | ≤8 kg            | Tympanic pressure    | ≤12 kg             | Thickness of filter plate | 40/35 room 10           |

**Table S3.** Time required for vacuum filtration and membrane filter press

| Solid-liquid separation and washing methods | Filtration and washing time | Moisture content | Drying time | Total time for solid-liquid separation, washing, and drying |
|---------------------------------------------|-----------------------------|------------------|-------------|-------------------------------------------------------------|
| Vacuum filtration                           | 5 h                         | 70%              | 11 h        | 16 h                                                        |
| Membrane filter press                       | 0.5 h                       | 60%              | 7 h         | 7.5 h                                                       |

**Table S4.** Products and treatment methods of PbO/RHAC preparation process

| product                     | Main ingredients                                                                      | Generated quantity | Treatment measures |
|-----------------------------|---------------------------------------------------------------------------------------|--------------------|--------------------|
| Heat treatment              | H <sub>2</sub> O                                                                      | -200 g             | Alkali             |
| gas products                | CO <sub>2</sub>                                                                       | -360 g             | absorption         |
| Heat treated solid products | PbO, Pb, and amorphous carbon                                                         | -950 g             | Load               |
| Mother liquor               | CH <sub>3</sub> COONa,<br>(CH <sub>3</sub> COO) <sub>2</sub> Pb、 CH <sub>3</sub> COOH | -590 L             | Recycling          |

**Table S5.** Component quality of filtrate

| Filtrate ion | Theoretical content<br>(g) | Actual content (g) | Actual content /<br>Theoretical content |
|--------------|----------------------------|--------------------|-----------------------------------------|
| Acetate ion  | 1057.90                    | 1046.94            | 98.96%                                  |
| Citrate ion  | 845.88                     | 0.00               | 0.00%                                   |
| Sodium ion   | 206.32                     | 132.23             | 64.01%                                  |
| Lead ions    | 927.36                     | 15.13              | 1.63%                                   |

**Table S6.** Lead oxide and lead content in PbO/RHAC-T-t-r (determined by chemical titration)

| Sample            | Titration volume of PbO (mL) | Titration volume of Pb (mL) | PbO content (mg) and percentage (%) | Pb content (mg) and percentage (%) |
|-------------------|------------------------------|-----------------------------|-------------------------------------|------------------------------------|
| PbO/RHAC-400-2-2  | 17.6                         | 0.1                         | 196.2 (19.6%)                       | 1.0 (0.1%)                         |
| PbO/RHAC-450-2-2  | 17.2                         | 0.5                         | 191.8 (19.2%)                       | 5.2 (0.5%)                         |
| PbO/RHAC-550-2-2  | 16.6                         | 1.2                         | 185.1 (18.5%)                       | 12.4 (1.2%)                        |
| PbO/RHAC-450-2-15 | 17.4                         | 0.3                         | 194.0 (19.4%)                       | 3.1 (0.3%)                         |

**Table S7.** Tafel slope of different additives

| No. | Composites              | Tafel slope                    | Enhancement ratio | Reference        |
|-----|-------------------------|--------------------------------|-------------------|------------------|
| 1   | Pb@C-0.1                | 312 mV dec <sup>-1</sup>       | 61.65%            | 1                |
| 2   | HTT2000                 | 187 mV dec <sup>-1</sup>       | 92.78%            | 2                |
| 3   | PbSAs@rGO               | 378 mV dec <sup>-1</sup>       | 68.75%            | 3                |
| 4   | <b>PbO/RHAC-450-2-2</b> | <b>408 mV dec<sup>-1</sup></b> | <b>124.59%</b>    | <b>This work</b> |

**Table S8.** Discharge capacity of 2 V/2 Ah battery at different rates

| Battery  | C <sub>10</sub> (mAh) | C <sub>3</sub> (mAh) | C <sub>1</sub> (mAh) |
|----------|-----------------------|----------------------|----------------------|
| Blank    | 2268.5                | 1882.1               | 1457.9               |
| RHAC     | 2319.8                | 1941.6               | 1525.8               |
| PbO/RHAC | 2408.7                | 2086.7               | 1630.6               |

**Table S9.** Performance comparison of deep-cycle life

| No. | Sample                | Profiles of operation     | Cycling life | Capacity retention rate | Reference            |
|-----|-----------------------|---------------------------|--------------|-------------------------|----------------------|
| 1   | FLG                   | 3.5 C 100%<br>DoD         | 120          | Not reported            | 4                    |
| 2   | AGM VRLA<br>batteries | 1 C 100%<br>DoD           | 200          | 80%                     | 5                    |
| 3   | SEPC-PbO              | 0.5 C 100%<br>DoD         | 400          | 84%                     | 6                    |
| 4   | Industrial LCB        | 0.1 C 70%<br>DoD          | 480          | 80%                     | 7                    |
| 5   | CB3                   | 0.5 C 100%<br>DoD         | 430          | 80%                     | 8                    |
| 6   | Graphene              | 0.5 C 100%<br>DoD         | 380          | 80%                     | 9                    |
| 7   | <b>PbO/RHAC</b>       | <b>0.5 C 100%<br/>DoD</b> | <b>593</b>   | <b>80%</b>              | <b>This<br/>work</b> |

**Table S10.** Material balance for large scale preparation of PbO/RHAC

| Process Unit                               | Input name                                                         | Input mass | Output name                                           | Output mass |
|--------------------------------------------|--------------------------------------------------------------------|------------|-------------------------------------------------------|-------------|
| Complexation precipitation reaction        | RHAC                                                               | 4 kg       | Lead citrate/RHAC/Sodium acetate/Acetic acid/Water    | 57.62 kg    |
|                                            | Sodium acetate                                                     | 1.22 kg    |                                                       |             |
|                                            | citric acid                                                        | 0.94 kg    |                                                       |             |
|                                            | Lead acetate                                                       | 1.46 kg    |                                                       |             |
|                                            | pure water                                                         | 50 L       |                                                       |             |
|                                            | Lead                                                               |            |                                                       |             |
| Solid-liquid separation and washing        | citrate/RHAC/Sodium acetate/Acetic acid/Water solid-liquid mixture | 57.62 kg   | Lead citrate/RHAC/water                               | 13.63 kg    |
|                                            | Washing water                                                      | 546 L      | Lead acetate/sodium acetate/acetic acid/water mixture | 589.99 kg   |
|                                            | Lead                                                               | 13.63 kg   | Lead Citrate/RHAC                                     | 5.45 kg     |
| Heat treatment                             | Lead Citrate/RHAC                                                  | 5.45 kg    | PbO/RHAC                                              | 4.95 kg     |
| Mother liquor recovery and waste treatment | Residual lead acetate                                              | 23.75 g    | Supplement lead acetate                               | 1.44 kg     |

**Table S11.** Yield and Recovery rate in the large-scale preparation process of PbO/RHAC

| Materials                                        | Yield (kg) | Recovery rate (%) | Overall recovery rate (%) |
|--------------------------------------------------|------------|-------------------|---------------------------|
| Theoretical yield of lead citrate                | 1.57       |                   |                           |
| Actual yield of lead citrate                     | 1.45       | 92.4              |                           |
| Theoretical yield of lead citrate/RHAC precursor | 5.57       |                   |                           |
| Actual yield of lead citrate/RHAC precursor      | 5.45       | 97.8              | 96.2                      |
| Theoretical yield of PbO/RHAC                    | 5.03       |                   |                           |
| Actual yield of PbO/RHAC                         | 4.95       | 98.4              |                           |

**Table S12.** Economic evaluation of green large-scale preparation process of PbO/RHAC

| Materials                               | Unit price                | Consume <sup>a</sup> or produce <sup>b</sup> | Cost <sup>a</sup> or price <sup>b</sup> (¥) |
|-----------------------------------------|---------------------------|----------------------------------------------|---------------------------------------------|
| Rice husk activated carbon <sup>a</sup> | 100.00 ¥ kg <sup>-1</sup> | -4.00 kg                                     | -400.00                                     |
| Sodium acetate <sup>a</sup>             | 6.8 ¥ kg <sup>-1</sup>    | -1.22 kg                                     | -8.30                                       |
| Citric acid <sup>a</sup>                | 27.00 ¥ kg <sup>-1</sup>  | -0.94 kg                                     | -25.38                                      |
| Lead acetate <sup>a</sup>               | 34.00 ¥ kg <sup>-1</sup>  | -1.43 kg                                     | -48.62                                      |
| Water <sup>a</sup>                      | 2.00 ¥ t <sup>-1</sup>    | -0.59 t                                      | -1.18                                       |
| Nitrogen <sup>a</sup>                   | 0.04 ¥ L <sup>-1</sup>    | -1440.00 L                                   | -57.60                                      |
| Electricity <sup>a</sup>                | 0.45 ¥ kWh <sup>-1</sup>  | -80.00 kWh                                   | -36.00                                      |
| PbO/RHAC <sup>b</sup>                   | 180 ¥ kg <sup>-1</sup>    | +4.95                                        | +891.00                                     |
| Total cost                              | --                        | --                                           | -577.08                                     |
| Unit cost                               |                           |                                              | 116.58                                      |
| Total revenue                           | --                        | --                                           | 891.00                                      |
| Gross profit                            | --                        | --                                           | 313.92                                      |
| Unit gross profit                       |                           |                                              | 63.42                                       |
| Gross margin                            | --                        | --                                           | 35.23%                                      |

Gross margin = (total revenue - total cost) / total revenue.

a and b represent raw materials and products, respectively, denoted by negative and positive values.

**Text S1:** The electrochemical performance of PbO/RHAC was evaluated using graphite-based membrane electrodes. Test materials, acetylene black, and polytetrafluoroethylene were uniformly dispersed in 20 mL of ethanol at a mass ratio of 85:10:5. The mixture was heated and stirred at 90 °C to form a homogeneous blend, which was then rolled into a uniform carbon film. After drying the carbon film at 80 °C for 12 h, it was cut into carbon discs measuring  $10.00 \times 10.00 \text{ mm}^2$  ( $5.00 \pm 0.1 \text{ mg}$ ). Finally, the carbon discs were laminated onto graphite sheets under 5 MPa pressure. The exposed graphite areas around the periphery were sealed with epoxy resin and air-dried to produce graphite-based membrane electrodes <sup>10</sup>.

Performance testing of PbO/RHAC as anode additives was conducted in 2 V/2 Ah test batteries. The anodes were prepared using a typical paste method. Short polymer fibers, BaSO<sub>4</sub> particles, sodium lignosulfonate, acetylene black, and humic acid were uniformly mixed in a proportion of 0.13 wt.%, 0.80 wt.%, 0.20 wt.%, 0.20 wt.%, and 0.20 wt.%, respectively, relative to the mass of lead oxide powder. The mixture was further blended with 11.50 wt.% pure water and 8.80 wt.% sulfuric acid solution ( $1.41 \text{ g cm}^{-3}$ ) to form a paste. This paste was uniformly coated onto Pb-Sn-Ca alloy grids. The coated negative plates were flattened using a roller and then immersed in sulfuric acid ( $1.14 \text{ g cm}^{-3}$ ) for 3 seconds. Subsequently, a curing and drying process was conducted in four stages: 50 °C, 98% humidity, cured for 24 h; 55 °C, 80% humidity, cured for 15 h; 60 °C, 30% humidity, cured for 3 h; 70 °C, 10% humidity, cured for 3 h. The resulting anode plate was designated as Blank. The LCB anode paste was prepared using a similar process, but with the additional incorporation of 1.00 wt.% RHAC base material.

The cured positive and negative plates are assembled with the AGM separator separating the electrodes. The active material masses for the positive and negative electrodes are  $22.00 \pm 0.1 \text{ g}$  and  $16.0 \pm 0.1 \text{ g}$ , respectively. The 2 V/2 Ah test battery consists of two commercial positive plates and one handcrafted negative plate. The battery undergoes initialization after soaking in sulfuric acid solution ( $1.24 \text{ g cm}^{-3}$ ) for 2 h. The initialization steps are as follows: first, charge at  $0.0667 \text{ C}_2$  for 1 h, then at  $0.25 \text{ C}_2$  for 16 h, followed by charging at  $0.1333 \text{ C}_2$  for 2 h. Subsequently, discharge at

0.4167 C<sub>2</sub> until reaching 1.8 V. The second stage involved repeating the above charge-discharge cycle three times, followed by final charging at 0.125 C<sub>2</sub> for 8 h and 0.0417 C<sub>2</sub> for 2 h<sup>11</sup>. A sulfuric acid solution with a concentration of 5 mol L<sup>-1</sup> was used as the electrolyte for the cell.

## Text S2:

Electrochemical testing employed a three-electrode system comprising a working electrode (WE) made of a graphite-based membrane electrode, a graphite plate as the counter electrode (CE), and a mercurous sulfate Hg/Hg<sub>2</sub>SO<sub>4</sub> reference electrode (RE). The electrolyte consisted of an aqueous H<sub>2</sub>SO<sub>4</sub> solution (1.28 g cm<sup>-3</sup>). Testing was conducted using a Princeton Multichannel Electrochemical Testing System (PMC-1000). Cyclic voltammetry (CV) and linear sweep voltammetry (LSV) were performed over a potential range of -0.40 V to -1.40 V, with scan rates of 10 mV s<sup>-1</sup>, and 1 mV s<sup>-1</sup>, respectively. Specific capacitance values were obtained according to Equation 1 below.

$$C = \frac{1}{2Av\Delta V} \int_{v_1}^{v_2} I(V) dV \quad (1)$$

Here, C represents the specific capacitance (mF cm<sup>-2</sup>), A is the area of the working electrode (cm<sup>2</sup>), v represents the scan rate (V s<sup>-1</sup>), ΔV is the potential window width

$\int_{v_1}^{v_2} I(V) dV$  (V), and  $\int_{v_1}^{v_2} I(V) dV$  represents the integrated area of the CV curve. Electrochemical impedance spectroscopy (EIS) was performed at open circuit potential, with a voltage amplitude of 10 mV, and a frequency range of 100 kHz to 0.01 Hz. All EIS test data were fitted to specific values using ZSimpWin software based on the equivalent circuit diagram.

Electrochemical double-layer capacitance (C<sub>dl</sub>) testing is conducted via cyclic voltammetry within the non-faradaic region where no redox reactions occur. Centering on the open-circuit voltage (OCV) with a ±50 mV testing range, measurements were conducted at scan rates of 60 mV s<sup>-1</sup>, 80 mV s<sup>-1</sup>, 100 mV s<sup>-1</sup>, 120 mV s<sup>-1</sup>, and 140 mV s<sup>-1</sup>. The C<sub>dl</sub> values were obtained using the formula in Equation 2 below.

$$C_{dl} = I_C / v, \quad (2)$$

In the equation, I<sub>C</sub> represents the double-layer current density, also known as the non-faradaic current, whose value is half the difference between the charging and

discharging current densities, i.e.,  $(\Delta J = J_a - J_c)/2$ .  $v$  denotes the scan rate. Plotting  $I_c$  versus  $v$  yields a slope corresponding to the  $C_{dl}$  value.

In a three-electrode system, the electrochemistry of the negative plate generally uses a small negative plate (0.6 g, 8 mm × 15 mm × 1.5 mm) after formation as the working electrode, a formed commercial positive plate as the counter electrode (40.00 mm × 68.00 mm × 2.20 mm), mercurous sulfate (Hg/Hg<sub>2</sub>SO<sub>4</sub>) as the reference electrode, and H<sub>2</sub>SO<sub>4</sub> (1.28 g cm<sup>-3</sup>) as the electrolyte. Before electrochemical tests, the working electrode underwent 30 CV cycles at a scan rate of 50 mV to complete the activation process. The CV test potential range was: -1.40 V to -0.40 V, with a scan rate of 5 mV s<sup>-1</sup>. The LSV test potential range was -0.60 V to -1.60 V, with a scan rate of 1 mV s<sup>-1</sup>. EIS tests were performed at open circuit potential and -1.30 V potential, respectively, with a voltage amplitude of 10 mV and a frequency range of 100 kHz to 0.01 Hz.

All battery charge and discharge performances were tested using a battery tester (BTS 5V/6A, Shenzhen Neware Technology Co., Ltd., China). Unless otherwise specified, all test charging procedures employed constant current and constant voltage (2.40 V, 0.2 C<sub>10</sub>) for 7 h or until the cutoff current reached 0.01 C<sub>10</sub>. During rate capacity testing, fully charged batteries were discharged at currents of 0.1 C<sub>10</sub>, 1/3 C<sub>3</sub>, and 1 C<sub>1</sub> to voltages of 1.80 V, 1.70 V, and 1.60 V, respectively, with discharge capacity recorded. In the charge acceptance test, fully charged batteries were discharged at a current of I<sub>10</sub> for 5 h in a constant-temperature water bath maintained at 25 °C. Immediately after discharge completion, the batteries were placed in a 0 °C low-temperature chamber for 20 h. Subsequently, the batteries underwent constant-voltage charging at 2.40 V ± 0.10 V, with the charging current I<sub>ca</sub> recorded at the 10-minute mark post-charging initiation. The ratio of I<sub>ca</sub> to I<sub>10</sub> serves as an indicator of charge acceptance capacity<sup>12</sup>. In the HRPSoC cycle test, fully charged batteries were discharged to 50% SoC at a 1 C<sub>1</sub> current. This is followed by a 2 C<sub>1</sub> high-rate shallow cycle charge-discharge. The cycle process is as follows: 60 s of 2 C<sub>1</sub> charging and 60 s of 2 C<sub>1</sub> discharging; a 10 s rest period after each charge and discharge cycle until the discharge voltage reaches 1.75 V. Then, high-rate shallow cycling charge and discharge

at  $2 C_1$  was performed. The cycling process was as follows:  $2 C_1$  charge and discharge for 60 s each; after each charge and discharge, a 10 s rest period was applied until the discharge voltage reached 1.75 V. These three consecutive HRPSoC test blocks were each preceded by a full recharge of the battery. In the 0.5 C 100% DoD cycle test, the battery is charged for 7 hours by constant current and constant voltage (2.40 V,  $0.2 C_2$ ) or the cut-off current is  $0.01 C_2$ . Then it is discharged to 1.75 V with  $0.5 C_2$ , and each charge and discharge above is a cycle. When the discharge time for three consecutive times is less than 96 min (less than 80% of the discharge time), the battery is judged to be invalid, and the cycle life test is completed.

**Text S3:**

DFT calculation in this work was executed via the Vienna ab initio simulation package (VASP) software. For the exchange-correlation energy, the Perdew-Burke-Ernzerhof (PBE) form of the generalized gradient approximation (GGA) was adopted. The partial occupancies of wave functions were determined by the Gaussian smearing method, with a smearing width of 0.05 eV applied to smooth energy levels. In addition, the DFT-D3 correction term was used to accurately handle van der Waals forces. To ensure calculation accuracy, the plane-wave cutoff energy was set to 400 eV. The SCF convergence criterion was  $1 \times 10^{-7}$  eV. All systems were optimized until the maximum force on any single atom was below the convergence criterion of 0.02 eV/Å. For Brillouin zone sampling, k-point calculations were performed only at the  $\Gamma$ -point, to simplify calculations while maintaining sufficient accuracy. Considering computational efficiency and practical context, we set a 15 Å vacuum layer in the model to isolate adjacent periodic images. Solvation effects were ignored in the calculations of this study. The adsorption energy ( $E_{\text{ads}}$ ) of PbO was determined by the given equation:  $E_{\text{ads}} = E_{\text{total}} - E_{\text{fragment}} - E_{\text{PbO}}$ , where  $E_{\text{total}}$ ,  $E_{\text{fragment}}$ , and  $E_{\text{PbO}}$  represent the total energy with PbO adsorbed, the total energy without PbO adsorbed, and the energy of PbO, respectively.

## References

1. P. He, Y. Yang, H. Huang, J. Huang, H. Wang, Y. He and Z. Guo, *Journal of Energy Chemistry*, 2024, **97**, 486-497.
2. J.-H. Wee, K. Nomura, H. Nishihara, D.-W. Kim, S. Hong, G. B. Choi, S. Y. Yeo, J. H. Kim, H.-Y. Jung and Y. A. Kim, *Carbon*, 2021, **185**, 419-427.
3. D. Tao, X. Liu, Z. Li, H. Yang, J. Wang and Q. Zhang, *Chemical Engineering Journal*, 2023, **461**, 141992.
4. S.-H. Chang, K.-C. Kung, W.-C. Huang and W.-R. Liu, *Thin Solid Films*, 2022, **753**, 139273.
5. T. Tantichanakul, O. Chailapakul and N. Tantavichet, *Journal of Power Sources*, 2011, **196**, 8764-8772.
6. Y. T. Hu, J. C. Li, A. Ali and P. K. Shen, *Journal of Energy Storage*, 2021, **41**, 102785.
7. , !!! INVALID CITATION !!! .
8. H.-Y. Hu, N. Xie, C. Wang, F. Wu, M. Pan, H.-F. Li, P. Wu, X.-D. Wang, Z. Zeng, S. Deng, M. H. Wu, K. Vinodgopal and G.-P. Dai, *Journal*, 2019, **9**.
9. H.-Y. Hu, N. Xie, C. Wang, L.-Y. Wang, R. M. Privette, H.-F. Li, M. Pan, F. Wu, X.-L. Yan, B.-B. Jiang, M. H. Wu, K. Vinodgopal and G.-P. Dai, *ACS Omega*, 2018, **3**, 7096-7105.
10. L. Wang, H. Zhang, G. Cao, W. Zhang, H. Zhao and Y. Yang, *Electrochimica Acta*, 2015, **186**, 654-663.
11. J. Yin, N. Lin, W. Zhang, Z. Lin, Z. Zhang, Y. Wang, J. Shi, J. Bao and H. Lin, *Journal of Energy Chemistry*, 2018, **27**, 1674-1683.
12. A. A. Moustafa, A. M. Ashmawy, I. M. Ghayad, A. A. El-Zomrawy and S. M. Abdelbasir, *Journal of Energy Storage*, 2022, **56**, 105932.
